# Supplementary figures and images for: Rapid RNase L–driven arrest of protein synthesis in the dsRNA response without degradation of translation machinery
Source: PubMed Central journal article supplement — RNA. 2017 Nov;23(11):1660–71. doi: 10.1261/rna.062000.117 (PMC5648034; doi:10.1261/rna.062000.117), 2017-11

**Figure S1**

**A**

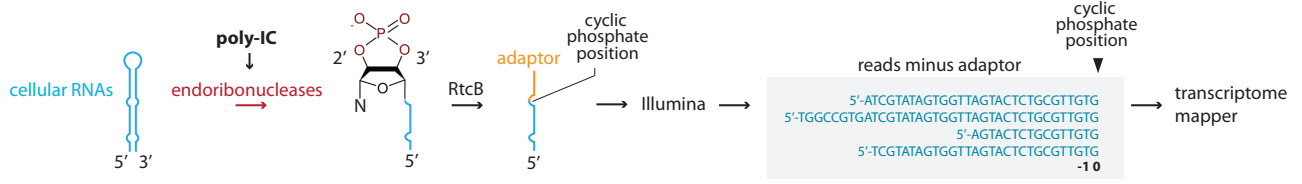

**B**

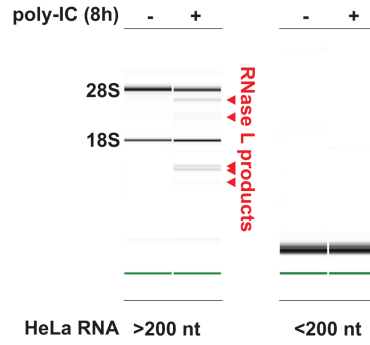

**C**

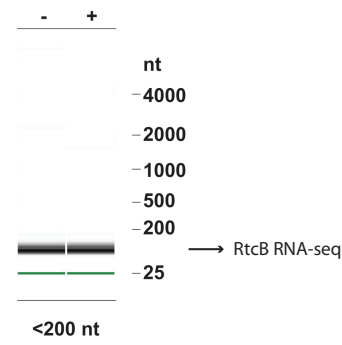

**D**

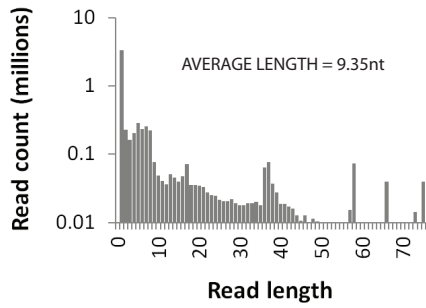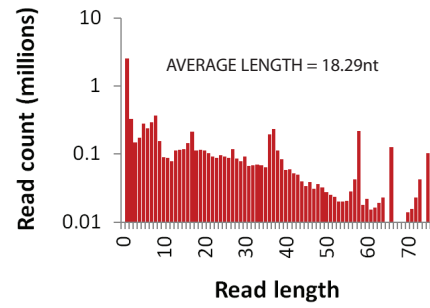

**E**

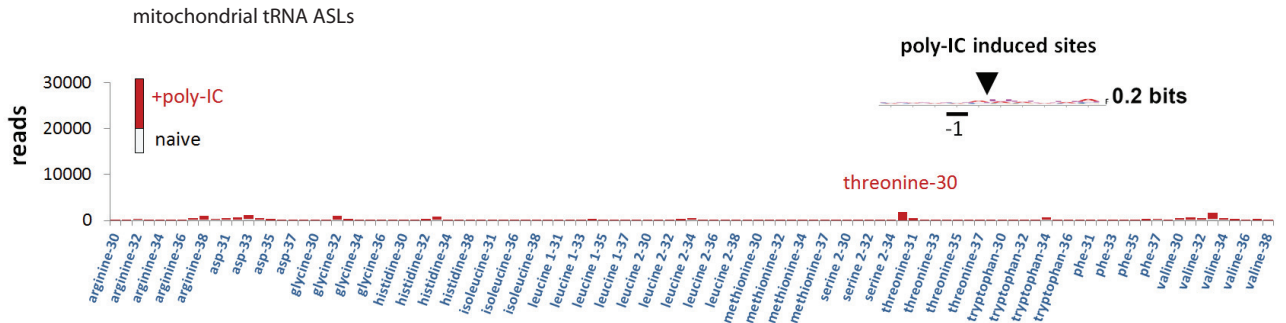

Supplement: supp_062000.117_Supplemental_Figure_F1.pdf [file supp_062000.117_Supplemental_Figure_F1.pdf]

**Figure S2**

**A**

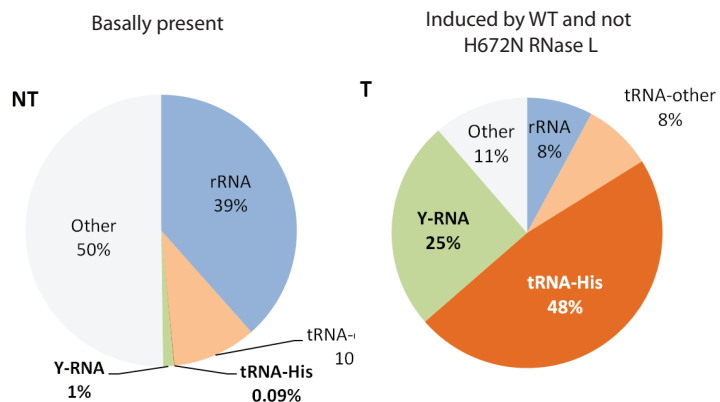

**B**

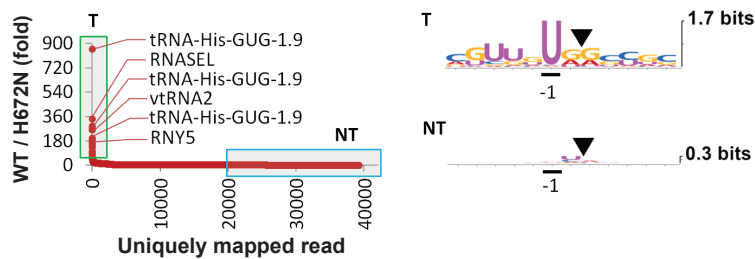

**C**

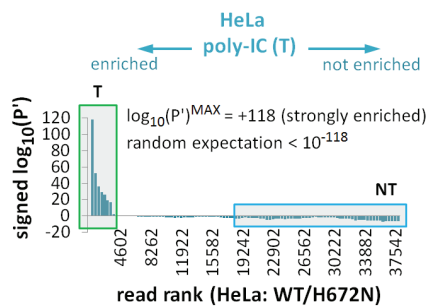

**D**

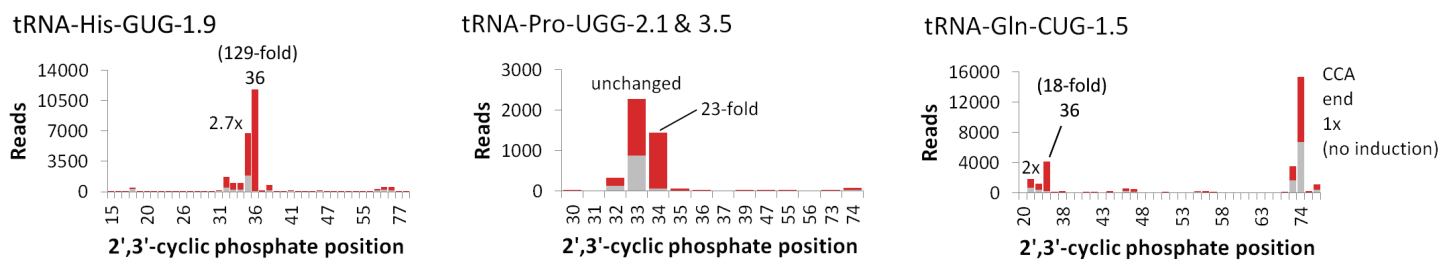

**E**

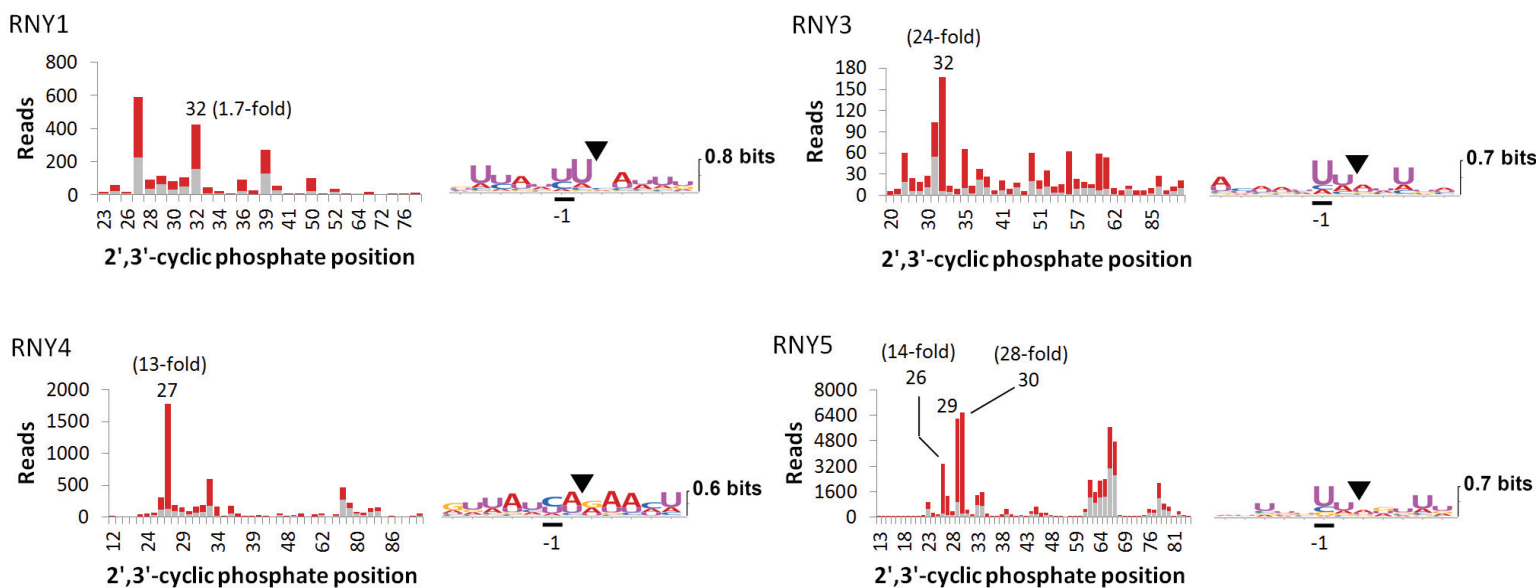

Supplement: supp_062000.117_Supplemental_Figure_F2.pdf [file supp_062000.117_Supplemental_Figure_F2.pdf]

**Figure S3**

**A**

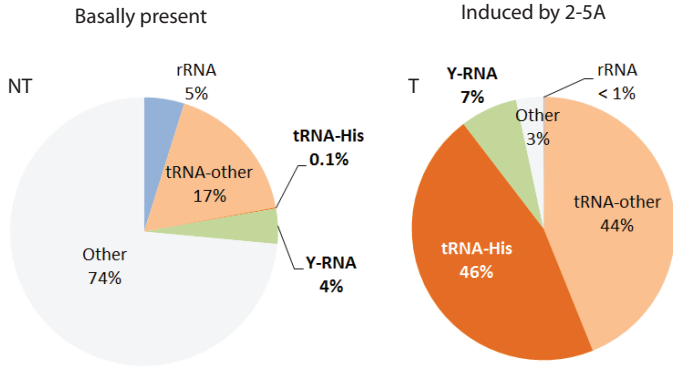

**B**

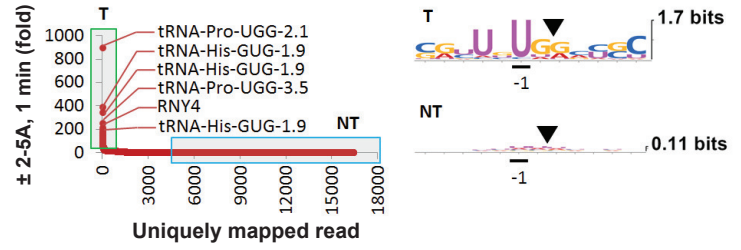

**C**

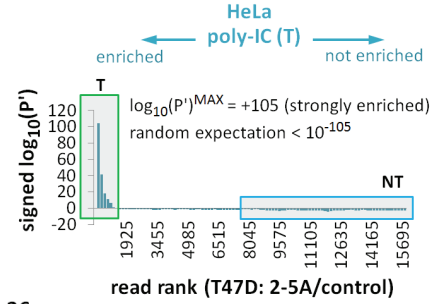

**D**

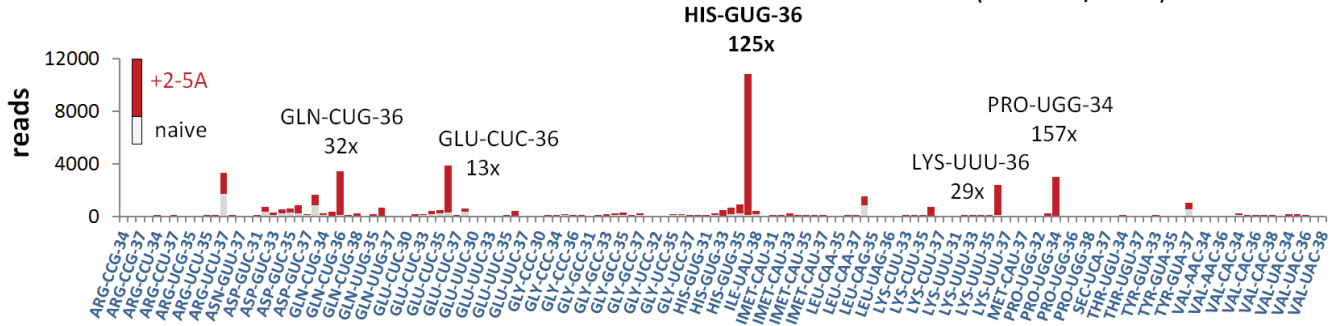

**E**

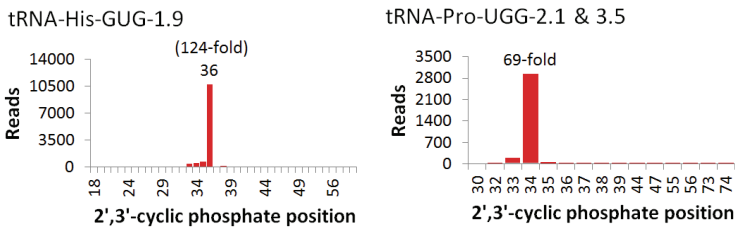

**F**

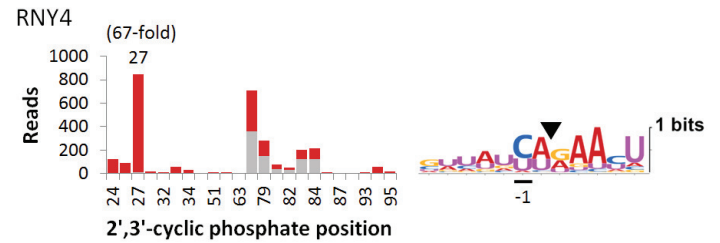

**tRNA-Gln-CUG-1.5**

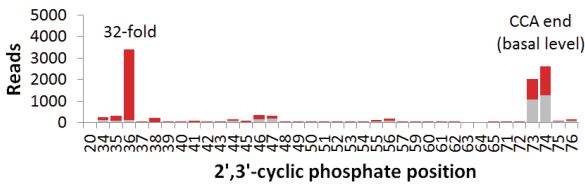

Supplement: supp_062000.117_Supplemental_Figure_F3.pdf [file supp_062000.117_Supplemental_Figure_F3.pdf]

**Figure S4**

**A**

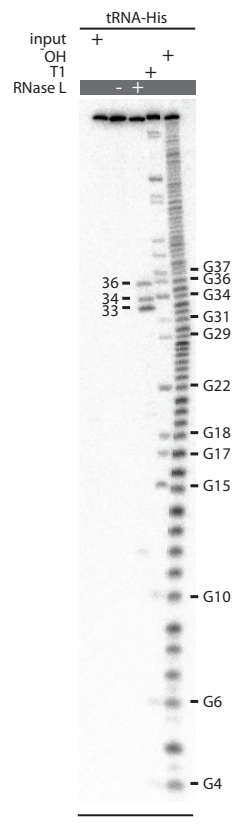

**B**

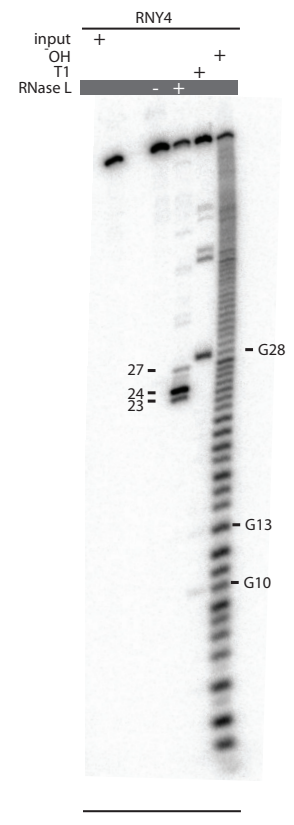

**C**

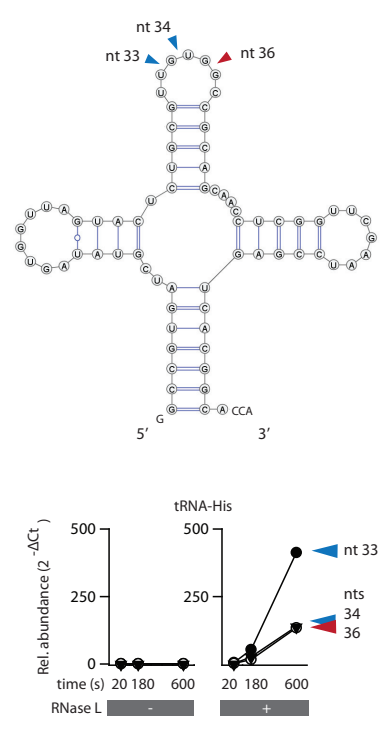

**D**

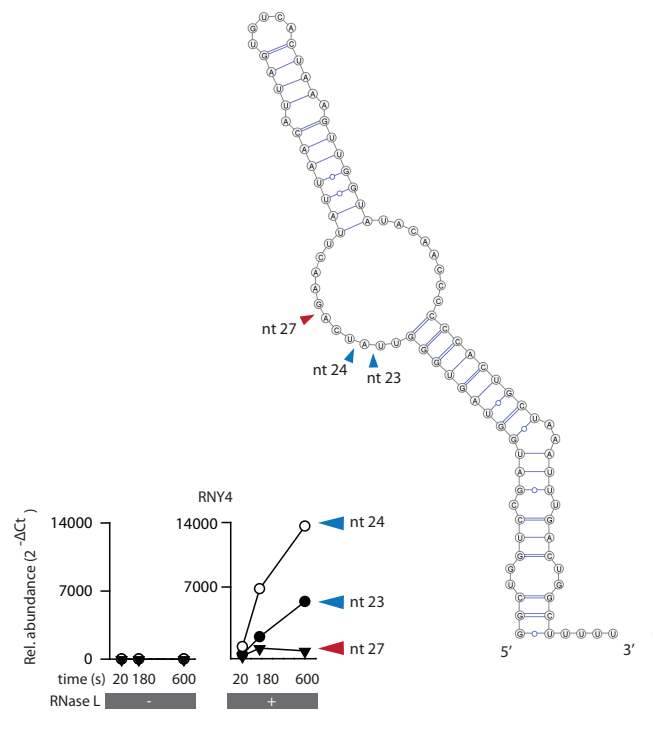

Supplement: supp_062000.117_Supplemental_Figure_F4.pdf [file supp_062000.117_Supplemental_Figure_F4.pdf]

**Figure S5**

**A**

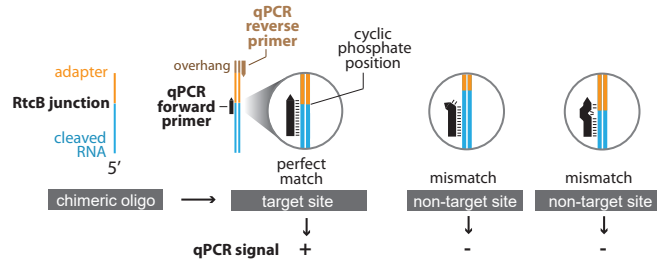

**B**

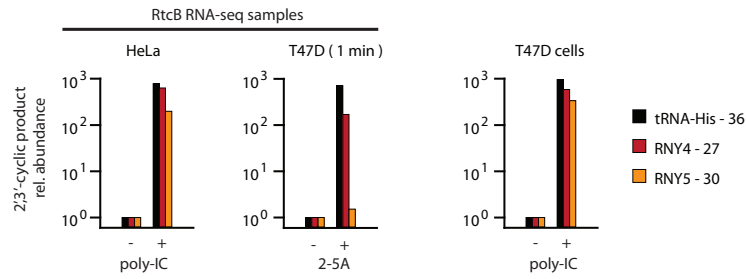

**C**

**D**

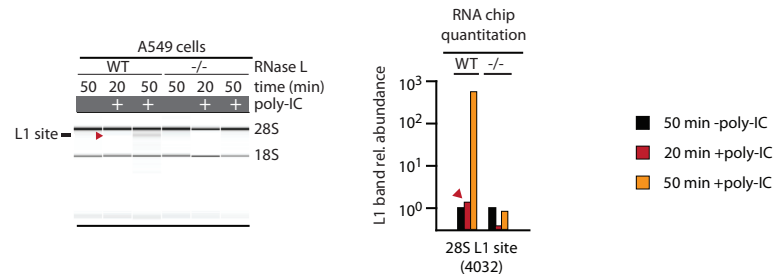

**E**

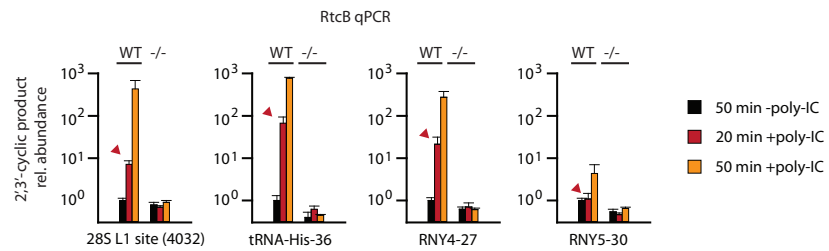

Supplement: supp_062000.117_Supplemental_Figure_F5.pdf [file supp_062000.117_Supplemental_Figure_F5.pdf]

**Figure S6**

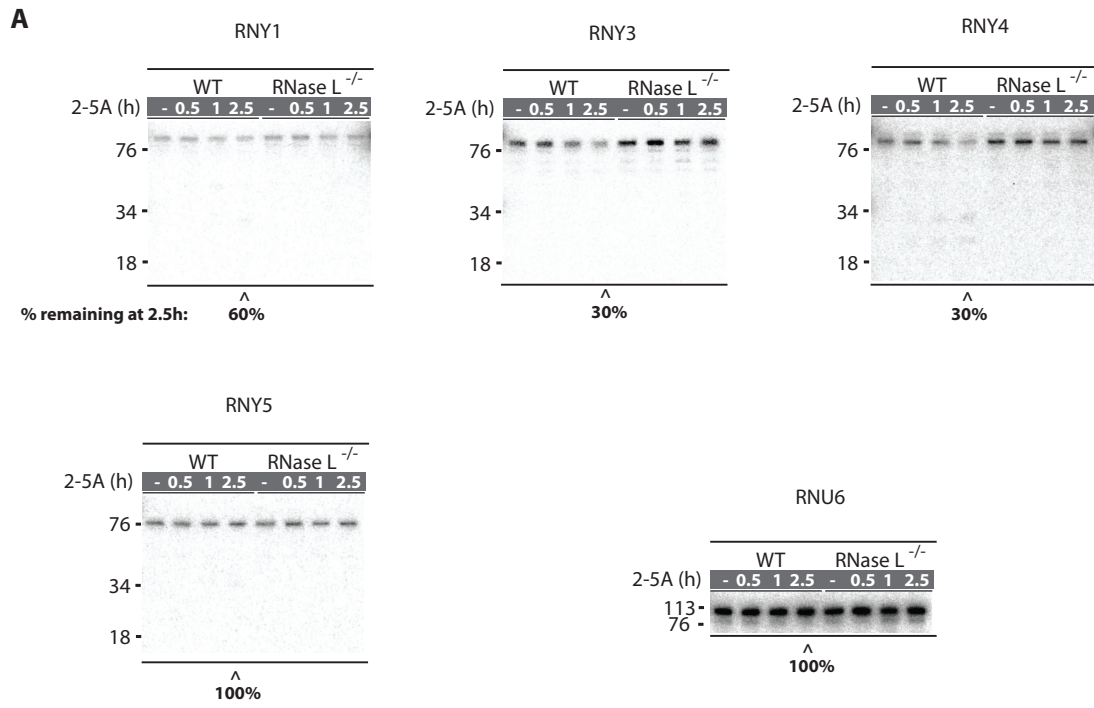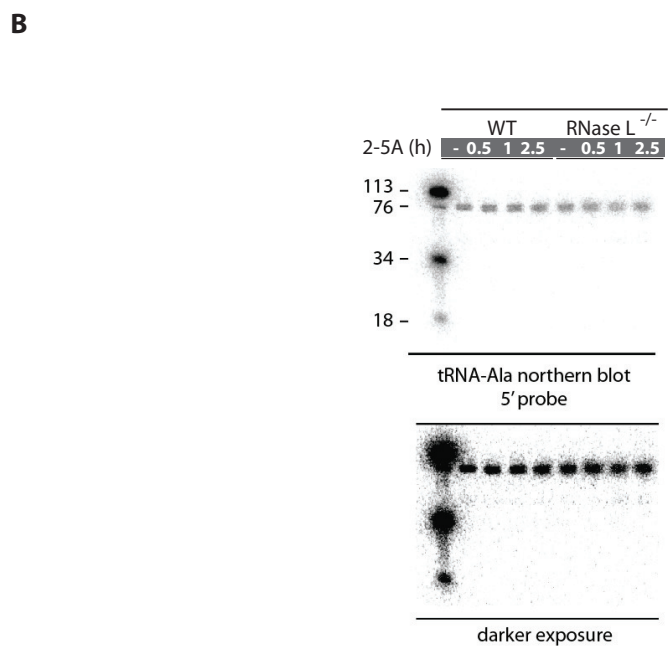

Supplement: supp_062000.117_Supplemental_Figure_F6.pdf [file supp_062000.117_Supplemental_Figure_F6.pdf]

**Figure S7**

**A**

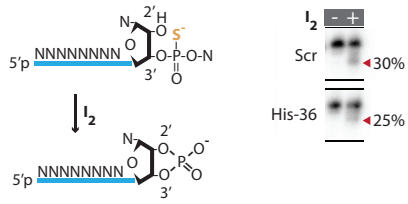

**B**

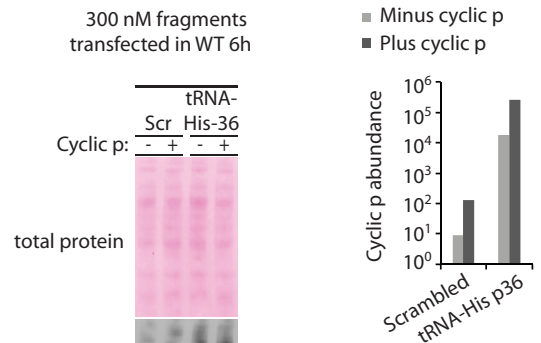

**C**

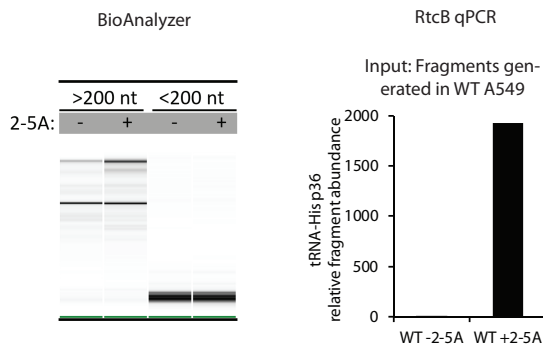

**D**

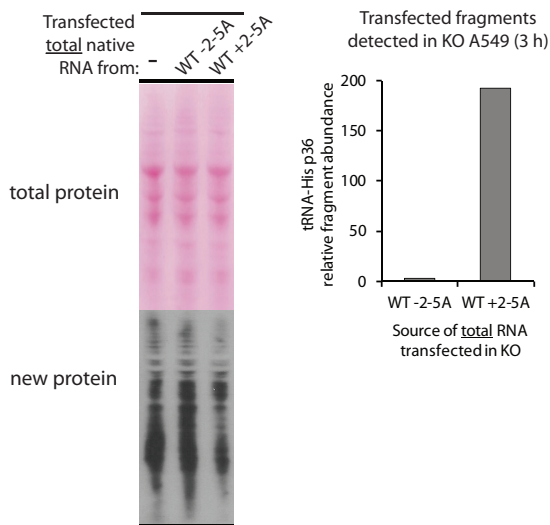

**E**

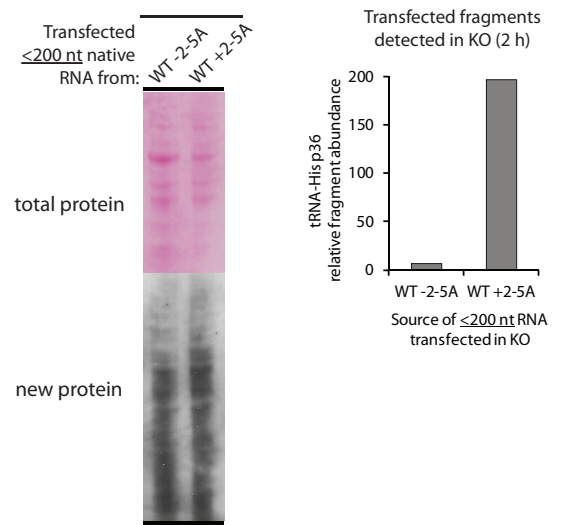

Supplement: supp_062000.117_Supplemental_Figure_F7.pdf [file supp_062000.117_Supplemental_Figure_F7.pdf]

**Figure S8**

**A**

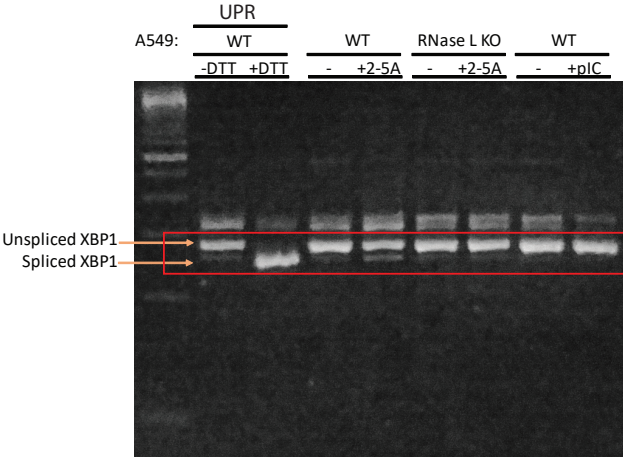

**B**

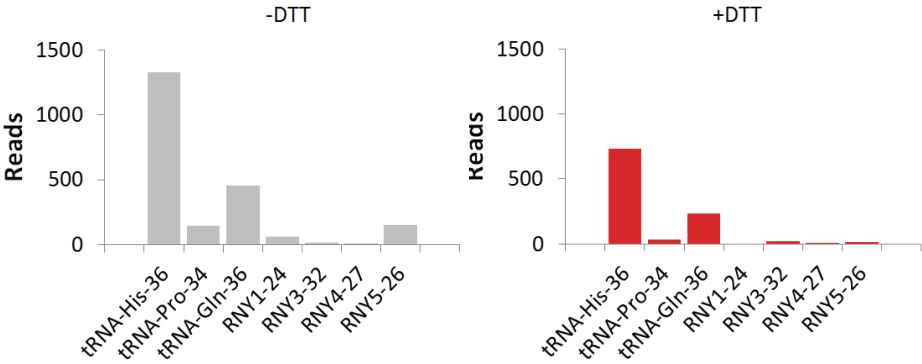

Supplement: supp_062000.117_Supplemental_Figure_F8.pdf [file supp_062000.117_Supplemental_Figure_F8.pdf]
